# Supplementary material for: Understanding Lignin Dissolution with Urea and the Formation of a Lignin Nano-Aggregate: A Multiscale Approach
Source: Nanomaterials (Basel). 2024 Mar 27;14(7):593. doi: 10.3390/nano14070593 (PMC11013285; doi:10.3390/nano14070593)
Supplement: Supplementary file 1 [file nanomaterials-14-00593-s001.zip › nanomaterials-2925151-supplementary.pdf]

Supplementary Materials

# Understanding Lignin Dissolution with Urea and the Formation of a Lignin Nano-Aggregate: A Multiscale Approach

Jinxin Lin <sup>1</sup>, Liheng Chen <sup>1,2,\*</sup>, Yanlin Qin <sup>1,2</sup> and Xueqing Qiu <sup>1,2,\*</sup>

<sup>1</sup> Guangdong Provincial Key Laboratory of Plant Resources Biorefinery, School of Chemical Engineering and Light Industry, Guangdong University of Technology, Guangzhou 510006, China; ylqin@gdut.edu.cn (Y.Q.)

<sup>2</sup> Guangdong Provincial Laboratory of Chemistry and Fine Chemical Engineering Jieyang Center, Jieyang 515200, China

\* Correspondence: lihengchen@gdut.edu.cn (L.C.); cexqqiu@scut.edu.cn (X.Q.)

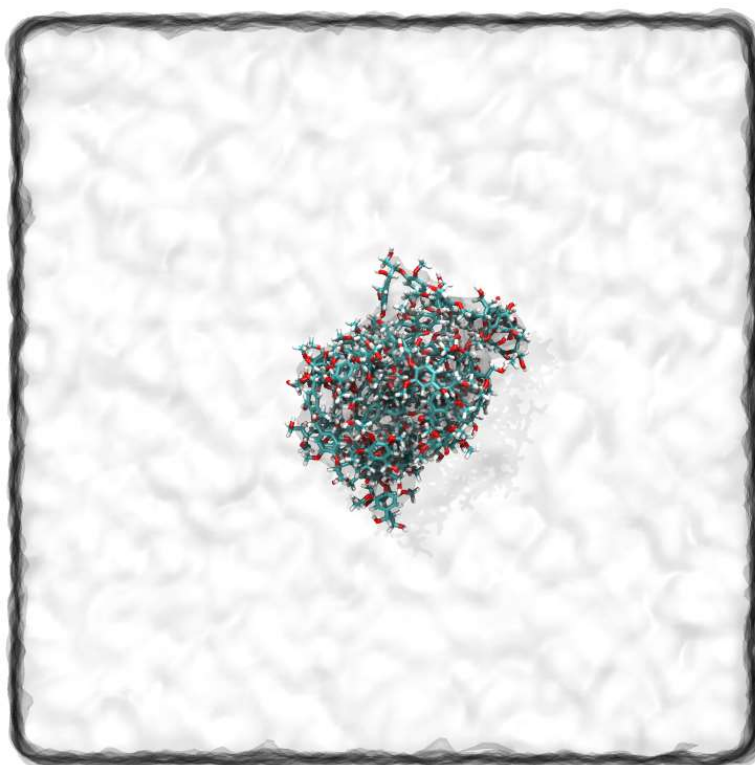

**Figure S1.** Example of the initial structure of 4 lignin molecules in a urea aqueous solvent.

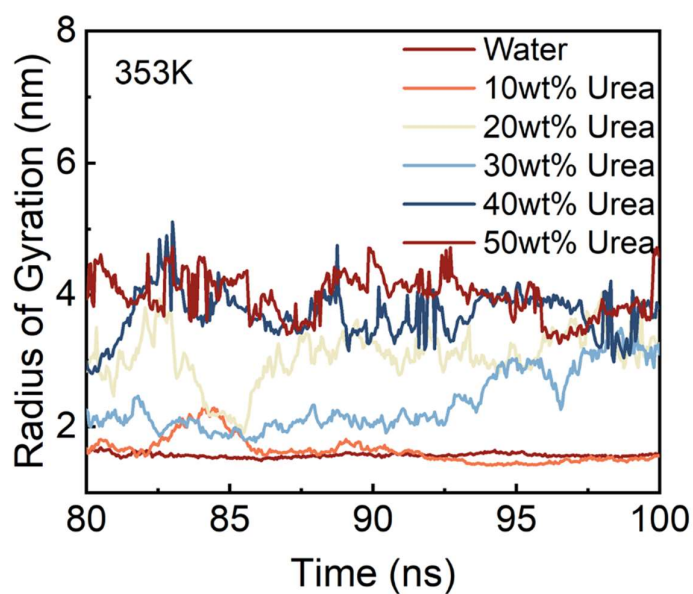

**Figure S2.** Time-dependent radius of gyration of lignin in urea aqueous solution with different urea concentration at 353K.

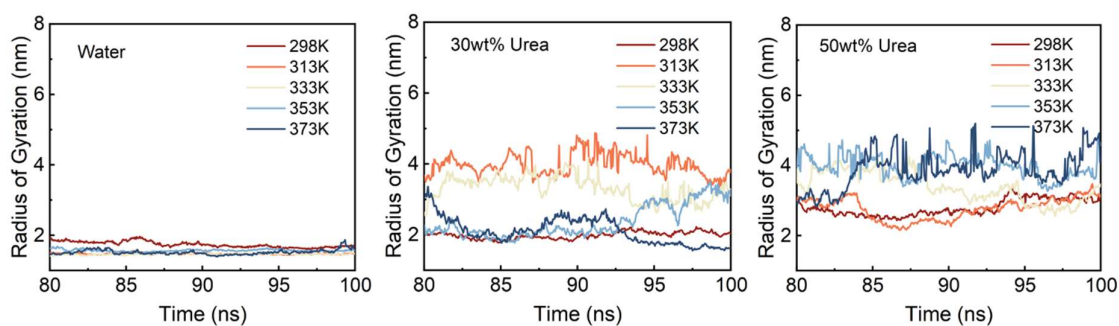

**Figure S3.** Time-dependent radius of gyration of lignin in urea aqueous solution at different temperature.

**Table S1.** pH value in urea aqueous solutions with different concentration.

| Urea aqueous solution concentration (wt%) | 10   | 20   | 30   | 40   | 50   |
|-------------------------------------------|------|------|------|------|------|
| pH                                        | 7.18 | 7.54 | 8.08 | 8.33 | 8.19 |

**Table S2.** Zeta potentials of lignin nano-aggregates produced from urea aqueous solutions with different concentration.

| Urea aqueous solution concentration (wt%) | 10              | 20              | 30              | 40              |
|-------------------------------------------|-----------------|-----------------|-----------------|-----------------|
| Zeta potential (mV)                       | $-33.2 \pm 0.9$ | $-32.1 \pm 0.2$ | $-26.4 \pm 1.4$ | $-34.9 \pm 1.4$ |
